# Supplementary material for: Transcriptome Profiling of Human Pre-Implantation Development
Source: PLoS One. 2009 Nov 16;4(11):e7844. doi: 10.1371/journal.pone.0007844 (PMC2773928; doi:10.1371/journal.pone.0007844)
Supplement: Table S17 — Affymetrix transcripts at different stages, part II (4.89 MB XLS) [file pone.0007844.s018.xls]

## Sheet: gene_list_MBEI
AFFY SYMBOL	GENE	PATTERN	ADU - EMB
1007_s_at	DDR1	1	1
1053_at	RFC2	3	-1
117_at	HSPA6	1	1
121_at	PAX8	2	0
1255_g_at	GUCA1A	2	0
1294_at	UBA7	1	1
1316_at	THRA	1	1
1320_at	PTPN21	3	-1
1405_i_at	CCL5	1	1
1431_at	CYP2E1	2	0
1438_at	EPHB3	1	1
1487_at	ESRRA	2	0
1494_f_at	CYP2A6	2	0
1552256_a_at	SCARB1	2	0
1552257_a_at	TTLL12	2	0
1552258_at	C2orf59	1	1
1552261_at	WFDC2	1	1
1552263_at	MAPK1	3	-1
1552264_a_at	MAPK1	2	0
1552266_at	ADAM32	1	1
1552269_at	SPATA17	2	0
1552271_at	MGC24975	2	0
1552272_a_at	MGC24975	1	1
1552274_at	PXK	3	-1
1552275_s_at	PXK	3	-1
1552276_a_at	VPS18	2	0
1552277_a_at	C9orf30	2	0
1552278_a_at	SLC46A1	1	1
1552279_a_at	SLC46A1	1	1
1552280_at	TIMD4	2	0
1552281_at	SLC39A5	1	1
1552283_s_at	ZDHHC11	1	1
1552286_at	ATP6V1E2	1	1
1552287_s_at	AFG3L1	3	-1
1552288_at	CILP2	1	1
1552289_a_at	CILP2	1	1
1552291_at	PIGX	2	0
1552293_at	TMEM196	1	1
1552295_a_at	SLC39A13	1	1
1552296_at	BEST4	2	0
1552299_at	C6orf199	2	0
1552301_a_at	CORO6	1	1
1552302_at	TMEM106A	2	0
1552303_a_at	TMEM106A	2	0
1552304_at	ALG10	2	0
1552306_at	ALG10	2	0
1552307_a_at	C18orf17	2	0
1552309_a_at	NEXN	2	0
1552310_at	C15orf40	3	-1
1552311_a_at	RAX2	2	0
1552312_a_at	MFAP3	3	-1
1552314_a_at	EYA3	3	-1
1552315_at	GIMAP1	2	0
1552316_a_at	GIMAP1	1	1
1552318_at	GIMAP1	1	1
1552319_a_at	KLK8	2	0
1552320_a_at	CCDC65	1	1
1552321_a_at	CCDC65	1	1
1552322_at	FAM122C	2	0
1552323_s_at	FAM122C	2	0
1552325_at	CCDC11	1	1
1552326_a_at	CCDC11	2	0
1552327_at	ARMCX4	1	1
1552329_at	RBBP6	2	0
1552330_at	MGC16385	2	0
1552332_at	TRIOBP	1	1
1552334_at	TRIOBP	2	0
1552335_at	CATSPER1	1	1
1552337_s_at	HOXD4	1	1
1552338_at	GSC	3	-1
1552340_at	SP7	1	1
1552343_s_at	PDE7A	1	1
1552344_s_at	CNOT7	2	0
1552347_at	CRYZL1	1	1
1552348_at	PRSS33	1	1
1552349_a_at	PRSS33	1	1
1552354_at	C19orf26	2	0
1552355_s_at	C19orf26	1	1
1552359_at	C8orf45	1	1
1552360_a_at	TIRAP	1	1
1552362_a_at	LEAP2	2	0
1552364_s_at	MSI2	3	-1
1552365_at	SCIN	2	0
1552367_a_at	SCIN	2	0
1552368_at	CTCFL	3	-1
1552370_at	C4orf33	3	-1
1552372_at	C4orf33	2	0
1552373_s_at	C4orf33	2	0
1552375_at	ZNF333	1	1
1552377_s_at	FAM18B2	1	1
1552378_s_at	RDH10	2	0
1552379_at	RDH10	1	1
1552381_at	SRrp35	3	-1
1552383_at	FAM71A	1	1
1552384_a_at	FAM71A	2	0
1552386_at	C5orf29	1	1
1552388_at	FLJ30901	1	1
1552389_at	C8orf47	3	-1
1552390_a_at	C8orf47	3	-1
1552391_at	C1orf65	2	0
1552393_at	ENTHD1	2	0
1552394_a_at	ENTHD1	2	0
1552395_at	TSSK3	1	1
1552396_at	WFDC6	1	1
1552398_a_at	CLEC12A	1	1
1552399_a_at	BRF1	1	1
1552400_a_at	C15orf27	1	1
1552401_a_at	NA	1	1
1552402_at	CALML6	2	0
1552405_at	NLRP5	3	-1
1552408_at	ODF4	1	1
1552409_a_at	ODF4	2	0
1552410_at	CLEC4F	1	1
1552411_at	DEFB106A	1	1
1552412_a_at	DEFB106A	1	1
1552414_at	WFDC9	1	1
1552415_a_at	WFDC9	1	1
1552417_a_at	NEDD1	3	-1
1552418_at	TTLL10	1	1
1552419_s_at	TTLL10	1	1
1552421_a_at	CALR3	2	0
1552422_at	C10orf25	1	1
1552423_at	ETV3	1	1
1552424_at	KLHL10	2	0
1552425_a_at	KLHL10	1	1
1552426_a_at	TM2D3	3	-1
1552427_at	ZNF485	2	0
1552430_at	WDR17	1	1
1552432_at	FLJ35773	1	1
1552436_a_at	CDH23	1	1
1552438_a_at	ANKAR	1	1
1552439_s_at	MEGF11	2	0
1552440_at	GPR182	2	0
1552445_a_at	ESX1	2	0
1552448_a_at	C8orf12	3	-1
1552449_a_at	SCGB1C1	1	1
1552450_a_at	DNAJC5G	1	1
1552452_at	WDR88	1	1
1552453_a_at	WDR88	2	0
1552455_at	PRUNE2	2	0
1552456_a_at	MBD3L2	3	-1
1552457_a_at	ADAMTSL1	2	0
1552458_at	MBD3L1	1	1
1552459_a_at	MBD3L1	2	0
1552461_at	FAM46D	2	0
1552463_at	SERPINB11	2	0
1552466_x_at	ADAD1	2	0
1552467_at	DSCR10	1	1
1552468_a_at	DSCR10	1	1
1552470_a_at	ABHD11	2	0
1552472_a_at	CENTB2	3	-1
1552473_at	GAMT	2	0
1552474_a_at	GAMT	1	1
1552476_s_at	PLCD3	2	0
1552477_a_at	IRF6	3	-1
1552478_a_at	IRF6	2	0
1552480_s_at	PTPRC	1	1
1552481_s_at	MAN1A2	3	-1
1552482_at	RAPH1	2	0
1552484_at	SMCR8	2	0
1552485_at	LACTB	1	1
1552486_s_at	LACTB	1	1
1552487_a_at	BNC1	3	-1
1552489_s_at	MPP4	3	-1
1552490_at	LACE1	2	0
1552491_at	IDI2	1	1
1552493_s_at	CYP11B1	2	0
1552494_at	TAF8	1	1
1552496_a_at	COBL	1	1
1552497_a_at	SLAMF6	1	1
1552498_at	ZSCAN20	1	1
1552499_a_at	ZSCAN20	1	1
1552501_a_at	GPBAR1	1	1
1552502_s_at	RHBDL2	2	0
1552503_at	FRAS1	1	1
1552504_a_at	BRSK1	1	1
1552506_at	CRB2	2	0
1552507_at	KCNE4	1	1
1552508_at	KCNE4	1	1
1552509_a_at	CD300LG	1	1
1552510_at	SLC34A3	1	1
1552511_a_at	CPA6	2	0
1552514_at	WBP2NL	1	1
1552515_at	HIPK1	1	1
1552516_a_at	HIPK1	1	1
1552518_s_at	MTBP	3	-1
1552519_at	ACVR1C	2	0
1552520_at	TMEM74	3	-1
1552521_a_at	TMEM74	3	-1
1552522_at	TIGD4	1	1
1552523_a_at	TIGD4	1	1
1552524_at	ART5	1	1
1552526_at	FAM71C	2	0
1552528_at	NA	2	0
1552531_a_at	NLRP11	3	-1
1552532_a_at	ATP6V1C2	2	0
1552535_at	CLDN19	2	0
1552536_at	VTI1A	2	0
1552538_a_at	KIF6	1	1
1552540_s_at	IQCD	3	-1
1552541_at	TAGAP	1	1
1552542_s_at	TAGAP	2	0
1552543_a_at	STON2	1	1
1552544_at	SERPINA12	1	1
1552546_a_at	LETM2	1	1
1552548_at	BSND	1	1
1552549_a_at	BSND	1	1
1552552_s_at	CLEC4C	3	-1
1552553_a_at	NLRC4	2	0
1552554_a_at	NLRC4	1	1
1552555_at	PRSS36	2	0
1552557_a_at	ZDHHC15	2	0
1552558_a_at	RAI1	1	1
1552559_a_at	PFTK2	1	1
1552562_at	ZNF570	3	-1
1552563_a_at	C8orf6	1	1
1552564_at	NUDT9P1	1	1
1552566_at	BTBD16	1	1
1552568_at	RTP3	1	1
1552569_a_at	RTP3	2	0
1552570_at	C21orf29	1	1
1552572_a_at	MIPOL1	2	0
1552573_s_at	MIPOL1	1	1
1552575_a_at	C6orf141	1	1
1552576_at	ALMS1P	1	1
1552578_a_at	MYO3B	2	0
1552579_a_at	ADAM21	1	1
1552580_at	TRIML2	3	-1
1552582_at	ABCC13	2	0
1552583_s_at	ABCC13	1	1
1552584_at	IL12RB1	1	1
1552585_s_at	GTF2A1L	1	1
1552586_at	TRPV3	1	1
1552587_at	CNBD1	3	-1
1552588_a_at	CNBD1	3	-1
1552590_a_at	ABCC12	1	1
1552592_at	MMP21	2	0
1552594_at	TMEM190	2	0
1552596_at	GAS2L2	1	1
1552598_at	KCNG4	1	1
1552599_at	PXT1	1	1
1552602_at	CACNG5	2	0
1552604_at	C21orf74	1	1
1552605_s_at	C21orf74	1	1
1552607_at	CXorf52	1	1
1552608_at	WFDC11	1	1
1552609_s_at	IL28B	1	1
1552610_a_at	JAK1	1	1
1552611_a_at	JAK1	2	0
1552612_at	CDC42SE2	2	0
1552613_s_at	CDC42SE2	3	-1
1552615_at	ACACB	1	1
1552616_a_at	ACACB	1	1
1552617_a_at	RFWD2	2	0
1552618_at	STX6	3	-1
1552619_a_at	ANLN	3	-1
1552620_at	SPRR4	1	1
1552621_at	POLR2J4	1	1
1552622_s_at	POLR2J4	1	1
1552623_at	HSH2D	2	0
1552625_a_at	TRNT1	3	-1
1552626_a_at	TMEM163	3	-1
1552627_a_at	ARHGAP5	1	1
1552628_a_at	HERPUD2	2	0
1552629_a_at	JMJD6	1	1
1552630_a_at	SRCAP	2	0
1552631_a_at	MAP3K6	2	0
1552632_a_at	ARSG	1	1
1552633_at	ZNF101	3	-1
1552634_a_at	ZNF101	3	-1
1552637_at	PTPN11	1	1
1552639_at	KLHDC7B	1	1
1552641_s_at	ATAD3B	3	-1
1552643_at	ZNF626	3	-1
1552644_a_at	PHC3	2	0
1552646_at	IL11RA	1	1
1552648_a_at	TNFRSF10A	2	0
1552649_a_at	RFFL	2	0
1552651_a_at	RFFL	1	1
1552652_at	HPS4	2	0
1552656_s_at	UHMK1	1	1
1552657_a_at	TXNDC2	1	1
1552658_a_at	NAV3	1	1
1552660_a_at	C5orf22	2	0
1552661_at	PCDHGB7	3	-1
1552662_a_at	PCDHGB7	1	1
1552663_a_at	ERC1	1	1
1552664_at	FLCN	3	-1
1552665_at	MGC14425	2	0
1552666_a_at	LRRC7	1	1
1552667_a_at	SH2D3C	1	1
1552669_at	PPP1R3B	1	1
1552670_a_at	PPP1R3B	1	1
1552671_a_at	SLC9A7	2	0
1552672_a_at	IGSF3	1	1
1552673_at	RFXDC1	1	1
1552674_at	DIRC1	2	0
1552675_at	DNAJB7	2	0
1552676_at	UCN3	1	1
1552677_a_at	DIP2A	1	1
1552678_a_at	USP28	2	0
1552680_a_at	CASC5	3	-1
1552682_a_at	CASC5	3	-1
1552684_a_at	SENP8	3	-1
1552685_a_at	GRHL1	3	-1
1552686_at	C20orf152	1	1
1552687_a_at	C20orf152	2	0
1552689_at	CASKIN1	2	0
1552690_a_at	CACNA2D4	2	0
1552691_at	ARL11	2	0
1552693_at	ARL11	3	-1
1552694_at	SLC2A13	2	0
1552695_a_at	SLC2A13	1	1
1552696_at	NIPA1	3	-1
1552698_at	MGC16703	1	1
1552701_a_at	COP1	1	1
1552703_s_at	COP1	1	1
1552705_at	DUSP19	2	0
1552708_a_at	DUSP19	3	-1
1552711_a_at	CYB5D1	3	-1
1552712_a_at	NMNAT2	2	0
1552713_a_at	SLC4A1	1	1
1552714_at	CREG2	2	0
1552715_a_at	RXFP1	1	1
1552716_at	SPEF2	1	1
1552717_s_at	CEP170L	1	1
1552718_at	DTD1	1	1
1552719_at	CASC4	1	1
1552721_a_at	FGF1	1	1
1552722_at	ARPP-21	2	0
1552724_at	RHOXF1	1	1
1552725_s_at	ADAMTS17	1	1
1552726_at	ADAMTS17	1	1
1552727_s_at	ADAMTS17	1	1
1552729_at	SNHG7	1	1
1552730_at	DHH	1	1
1552731_at	ABRA	1	1
1552732_at	ABRA	2	0
1552733_at	KLHDC1	1	1
1552734_at	RICTOR	2	0
1552735_at	PCDHGC3	1	1
1552736_a_at	NETO1	1	1
1552737_s_at	WWP2	2	0
1552738_a_at	ST7L	1	1
1552739_s_at	ST7L	1	1
1552740_at	C2orf15	3	-1
1552742_at	KCNH8	1	1
1552743_at	MCF2L	1	1
1552745_at	SLCO6A1	1	1
1552747_a_at	C3orf48	2	0
1552749_a_at	KLC3	1	1
1552750_at	CIB3	2	0
1552751_a_at	CIB3	1	1
1552752_a_at	CADM2	1	1
1552754_a_at	CADM2	2	0
1552755_at	C9orf66	2	0
1552757_s_at	C9orf66	2	0
1552758_at	HDAC9	1	1
1552760_at	HDAC9	3	-1
1552761_at	SLC16A11	1	1
1552763_at	TMEM67	1	1
1552765_x_at	TMEM67	1	1
1552766_at	HS6ST2	1	1
1552767_a_at	HS6ST2	1	1
1552768_at	CAMKK1	1	1
1552769_at	ZNF625	1	1
1552770_s_at	ZNF563	1	1
1552771_a_at	LIN9	3	-1
1552772_at	CLEC4D	1	1
1552773_at	CLEC4D	2	0
1552774_a_at	SLC25A27	1	1
1552775_at	GPRC6A	1	1
1552777_a_at	RAET1E	1	1
1552779_a_at	SLC44A5	1	1
1552782_at	SLC44A5	1	1
1552783_at	ZNF417	2	0
1552785_at	ZNF781	1	1
1552787_at	HELB	3	-1
1552788_a_at	HELB	2	0
1552789_at	TLOC1	1	1
1552790_a_at	TLOC1	1	1
1552791_a_at	TRDN	2	0
1552792_at	SOCS4	3	-1
1552793_at	C8orf31	2	0
1552794_a_at	ZNF547	3	-1
1552796_a_at	SIM1	1	1
1552797_s_at	PROM2	2	0
1552798_a_at	TLR4	2	0
1552799_at	TSNARE1	1	1
1552800_at	ABHD11	1	1
1552801_at	CAPN13	1	1
1552803_a_at	C1orf215	1	1
1552804_a_at	TIRAP	2	0
1552806_a_at	SIGLEC10	2	0
1552807_a_at	SIGLEC10	3	-1
1552808_at	ADAMTSL1	2	0
1552809_at	RFX4	2	0
1552811_at	WFIKKN1	1	1
1552812_a_at	SENP1	2	0
1552813_at	KLF14	1	1
1552814_a_at	KLF14	1	1
1552816_at	NXNL2	1	1
1552818_a_at	BRS3	1	1
1552819_at	C21orf86	1	1
1552822_at	TXNDC10	3	-1
1552825_at	ZNF396	1	1
1552826_at	SLC26A7	2	0
1552827_s_at	SLC26A7	1	1
1552828_at	SNX18	3	-1
1552829_at	SGMS1	1	1
1552830_at	FBXO39	1	1
1552833_at	B3GNT6	1	1
1552834_at	B3GNT6	2	0
1552835_at	DENND1B	1	1
1552836_at	ZNF619	2	0
1552837_at	ICK	2	0
1552839_at	FAM71D	1	1
1552841_s_at	BCL2L14	1	1
1552842_at	HS6ST3	2	0
1552843_at	SLC26A1	2	0
1552845_at	CLDN15	2	0
1552846_s_at	RAB42	2	0
1552848_a_at	PTCHD1	2	0
1552849_at	C2orf65	1	1
1552851_at	ZSCAN4	3	-1
1552852_a_at	ZSCAN4	3	-1
1552853_at	FLJ32784	2	0
1552854_a_at	FLJ32784	1	1
1552856_at	TMEM148	3	-1
1552857_a_at	HTR6	2	0
1552858_at	MAGEB6	2	0
1552860_at	TCEB3C	2	0
1552862_at	C1orf104	1	1
1552863_a_at	CACNG6	1	1
1552865_a_at	IFLTD1	1	1
1552867_at	NA	1	1
1552868_at	C19orf23	1	1
1552870_s_at	C1orf125	2	0
1552872_at	CXYorf2	1	1
1552873_s_at	CXYorf2	1	1
1552875_a_at	CD200R1	2	0
1552876_at	C21orf89	1	1
1552877_s_at	C21orf89	3	-1
1552878_at	ATOH7	2	0
1552879_a_at	ATOH7	1	1
1552880_at	SEC16B	2	0
1552882_a_at	FAM123B	1	1
1552884_at	NKX6-3	1	1
1552885_a_at	NKX6-3	1	1
1552887_at	C10orf27	1	1
1552889_a_at	EXOC3L2	2	0
1552890_a_at	CABP4	1	1
1552892_at	TNFRSF13C	1	1
1552893_at	CAMK2N2	1	1
1552895_a_at	IL13	2	0
1552897_a_at	KCNG3	1	1
1552898_a_at	KCNG3	2	0
1552899_at	RP4-662A9.2	1	1
1552900_a_at	RP4-662A9.2	1	1
1552902_a_at	FOXP2	2	0
1552903_at	B4GALNT2	3	-1
1552904_at	NETO1	2	0
1552906_at	FMR1NB	2	0
1552908_at	C1orf150	2	0
1552910_at	SIGLEC11	1	1
1552911_at	SIGLEC11	2	0
1552912_a_at	IL23R	3	-1
1552913_at	MAGEB18	2	0
1552914_a_at	CD276	2	0
1552915_at	IL28A	1	1
1552917_at	IL29	1	1
1552919_at	C4orf36	2	0
1552921_a_at	FIGNL1	3	-1
1552922_at	RIMS1	1	1
1552923_a_at	PITPNM2	1	1
1552924_a_at	PITPNM2	1	1
1552925_at	PCDH10	1	1
1552927_at	MAP3K7IP3	3	-1
1552928_s_at	MAP3K7IP3	3	-1
1552929_at	GRK7	2	0
1552930_at	MMEL1	1	1
1552931_a_at	PDE8A	1	1
1552932_at	NLRP6	2	0
1552933_at	C1orf62	1	1
1552935_at	ZCCHC5	1	1
1552937_s_at	ATRIP	2	0
1552938_at	ZIC5	2	0
1552939_at	ANGPT1	2	0
1552940_at	TEDDM1	1	1
1552942_at	FLJ30430	1	1
1552943_at	GABRG1	1	1
1552944_a_at	PANX2	1	1
1552946_at	ZNF114	3	-1
1552947_x_at	ZNF114	3	-1
1552948_at	CCDC27	1	1
1552950_at	C15orf26	1	1
1552952_at	RBMY2FP	1	1
1552953_a_at	NEUROD2	2	0
1552954_at	C5orf17	2	0
1552955_at	NA	1	1
1552957_at	LOC200383	1	1
1552960_at	LRRC15	1	1
1552961_at	DSCC1	2	0
1552964_at	C10orf93	1	1
1552965_a_at	B3GNT7	2	0
1552967_at	ZNF645	1	1
1552969_a_at	ZMYM6	1	1
1552970_s_at	ZMYM6	1	1
1552971_at	SGCZ	3	-1
1552972_at	hCG_2032978	2	0
1552973_at	WNT9B	1	1
1552974_at	NA	1	1
1552975_x_at	NA	1	1
1552976_at	DNAJB13	1	1
1552977_a_at	CNPY3	1	1
1552978_a_at	SCAMP1	2	0
1552979_at	C2orf52	1	1
1552980_at	HAS3	1	1
1552982_a_at	FGF4	1	1
1552985_at	SLC30A8	1	1
1552986_at	LOC142937	3	-1
1552987_a_at	MGC42157	1	1
1552988_at	C11orf65	2	0
1552990_at	FAM71E2	2	0
1552991_at	OR5P2	1	1
1552993_at	DYDC1	2	0
1552995_at	IL27	1	1
1552997_a_at	IQCF1	2	0
1552998_at	DEFB125	1	1
1552999_a_at	WFDC10B	2	0
1553002_at	DEFB105A	1	1
1553003_at	PKHD1	1	1
1553004_at	PKD1L1	2	0
1553006_at	GPR112	1	1
1553007_a_at	ODZ1	2	0
1553009_s_at	REXO1L1	3	-1
1553011_at	TAF1L	1	1
1553013_at	CNTNAP5	1	1
1553015_a_at	RECQL4	3	-1
1553016_at	GPR113	1	1
1553019_at	TMC2	1	1
1553020_at	SMCR5	1	1
1553021_s_at	BICD2	3	-1
1553022_at	ZIM3	2	0
1553023_a_at	NOX5	1	1
1553024_at	G30	2	0
1553025_at	GPR126	1	1
1553027_a_at	KLHL4	1	1
1553028_at	GPR156	2	0
1553030_a_at	SUOX	1	1
1553031_at	GPR115	2	0
1553032_at	IL31RA	1	1
1553033_at	SYTL5	2	0
1553034_at	SDCCAG8	1	1
1553036_at	GPR111	1	1
1553037_a_at	SYN2	2	0
1553039_a_at	ASB10	1	1
1553041_at	HTR3C	2	0
1553042_a_at	TA-NFKBH	1	1
1553043_a_at	CD300LF	1	1
1553044_at	GJA10	1	1
1553045_at	WNT9A	2	0
1553046_s_at	GAL3ST2	1	1
1553047_at	PIP4K2B	1	1
1553048_a_at	PIP4K2B	2	0
1553051_s_at	ODF3	1	1
1553052_at	WFDC13	2	0
1553053_at	C14orf48	1	1
1553055_a_at	SLFN5	1	1
1553057_at	SERPINB12	1	1
1553058_at	GIPC3	1	1
1553059_at	PGLYRP3	1	1
1553060_at	PSKH2	2	0
1553061_at	OR6W1P	1	1
1553062_at	MOGAT1	1	1
1553063_at	GPR78	2	0
1553064_at	H1FOO	3	-1
1553066_at	TAAR9	1	1
1553067_a_at	GNRHR2	1	1
1553069_at	C21orf87	1	1
1553070_a_at	MYOZ3	1	1
1553071_a_at	MYOZ3	1	1
1553072_at	BNIPL	1	1
1553074_at	ASB11	1	1
1553075_a_at	OFCC1	2	0
1553076_at	OFCC1	2	0
1553077_at	SDR-O	1	1
1553078_at	OR5P3	3	-1
1553079_at	TRIM40	1	1
1553080_at	CSN1S2A	1	1
1553081_at	WFDC12	1	1
1553082_at	CRYGN	2	0
1553083_at	NA	1	1
1553084_at	STARD6	2	0
1553086_at	C11orf40	3	-1
1553087_at	C18orf12	1	1
1553088_a_at	BCL2L11	1	1
1553089_a_at	WFDC2	2	0
1553093_a_at	DEFB119	1	1
1553094_at	TAC4	1	1
1553096_s_at	BCL2L11	2	0
1553099_at	TIGD1	2	0
1553101_a_at	ALKBH5	1	1
1553102_a_at	CCDC69	1	1
1553103_at	NFX1	2	0
1553105_s_at	DSG2	2	0
1553106_at	C5orf24	2	0
1553107_s_at	C5orf24	1	1
1553108_at	C5orf24	1	1
1553111_a_at	KBTBD6	2	0
1553112_s_at	CDK8	2	0
1553113_s_at	CDK8	3	-1
1553114_a_at	PTK6	1	1
1553115_at	NKD1	2	0
1553117_a_at	STK38	1	1
1553118_at	THEM4	1	1
1553120_at	CLSPN	1	1
1553122_s_at	RBAK	2	0
1553123_at	WDR62	1	1
1553125_x_at	WDR62	1	1
1553126_a_at	SLC39A12	3	-1
1553127_a_at	RNF168	1	1
1553129_at	SVEP1	3	-1
1553130_at	NA	1	1
1553131_a_at	GATA4	1	1
1553132_a_at	TC2N	3	-1
1553133_at	C9orf72	3	-1
1553134_s_at	C9orf72	1	1
1553136_at	KCTD18	1	1
1553137_s_at	KLF11	2	0
1553138_a_at	ANKLE1	2	0
1553139_s_at	PLXNA3	1	1
1553140_at	PELO	2	0
1553141_at	C13orf31	2	0
1553142_at	C13orf31	1	1
1553145_at	FLJ39653	1	1
1553146_at	C3orf30	2	0
1553147_at	RANBP3L	1	1
1553148_a_at	SNX13	3	-1
1553150_at	AOF1	3	-1
1553151_at	ATP6V0D2	2	0
1553153_at	ATP6V0D2	1	1
1553155_x_at	ATP6V0D2	1	1
1553156_at	LHX4	3	-1
1553157_at	LHX4	3	-1
1553158_at	C3orf34	1	1
1553159_at	DNAH11	2	0
1553162_x_at	C19orf55	1	1
1553163_at	ADPRHL1	1	1
1553165_at	AP1GBP1	1	1
1553166_at	CDH24	1	1
1553167_a_at	SEPSECS	3	-1
1553168_at	GRIK5	1	1
1553169_at	C20orf75	3	-1
1553171_x_at	C20orf75	3	-1
1553172_at	ZNF777	3	-1
1553174_at	JPH2	1	1
1553175_s_at	PDE5A	1	1
1553176_at	SH2D1B	1	1
1553177_at	SH2D1B	2	0
1553178_a_at	SSTR3	1	1
1553179_at	ADAMTS19	2	0
1553180_at	ADAMTS19	2	0
1553181_at	DDX31	1	1
1553183_at	UMODL1	3	-1
1553185_at	RASEF	1	1
1553186_x_at	RASEF	2	0
1553188_s_at	PARD3B	2	0
1553190_s_at	PARD3B	2	0
1553191_at	DST	2	0
1553192_at	ZNF441	1	1
1553193_at	ZNF441	2	0
1553194_at	NEGR1	1	1
1553196_a_at	FCRL3	1	1
1553197_at	WDR21C	3	-1
1553199_at	WDR21C	2	0
1553202_at	STOX1	3	-1
1553204_at	C20orf200	1	1
1553205_at	C20orf200	2	0
1553207_at	ARL10	1	1
1553208_s_at	ARL10	1	1
1553209_at	RNFT2	1	1
1553211_at	ANKFN1	2	0
1553212_at	KRT78	1	1
1553213_a_at	KRT78	1	1
1553214_a_at	CCDC7	2	0
1553215_s_at	CCDC7	1	1
1553216_at	ZNF41	2	0
1553217_s_at	ZNF41	1	1
1553218_a_at	ZNF512	1	1
1553219_a_at	AMMECR1	1	1
1553220_at	ALS2CR13	3	-1
1553221_at	ZNF583	1	1
1553222_at	OXER1	1	1
1553224_at	LUZP1	1	1
1553225_s_at	ZNF75	2	0
1553226_at	TMEM83	1	1
1553227_s_at	BRWD1	3	-1
1553228_at	CCDC89	1	1
1553229_at	ZNF572	1	1
1553232_at	FAM82A	1	1
1553234_at	ADAMTS18	1	1
1553235_at	PCDHAC1	2	0
1553237_x_at	PCDHAC1	1	1
1553238_a_at	HIPK4	2	0
1553239_at	FAM124A	1	1
1553241_at	NKAIN3	1	1
1553243_at	ITIH5	1	1
1553244_at	FANCB	3	-1
1553246_a_at	FLJ23356	2	0
1553247_a_at	ZNF709	2	0
1553248_at	CCDC57	1	1
1553249_at	SMC1B	1	1
1553252_a_at	BRWD3	3	-1
1553253_at	ASB16	1	1
1553254_at	MAGEE2	2	0
1553255_at	FLJ32214	1	1
1553257_at	GAL3ST3	1	1
1553258_at	FLJ30679	2	0
1553260_s_at	ALS2CR11	2	0
1553261_x_at	ALS2CR11	2	0
1553262_a_at	UTS2R	1	1
1553263_at	USH1G	1	1
1553264_a_at	SYN1	1	1
1553265_at	SLC23A3	1	1
1553266_at	CNOT6L	3	-1
1553267_a_at	CNOT6L	3	-1
1553268_at	RHBDL3	2	0
1553269_at	ZNF718	3	-1
1553271_at	DIP2B	1	1
1553272_at	SLC36A1	1	1
1553274_a_at	C6orf151	3	-1
1553275_s_at	NA	1	1
1553276_at	ZNF560	2	0
1553277_at	RTTN	2	0
1553279_at	BTNL9	1	1
1553280_at	PUS10	2	0
1553281_at	PLCXD2	2	0
1553282_at	C21orf128	1	1
1553284_s_at	LMLN	2	0
1553285_s_at	RAD9B	2	0
1553286_at	ZNF555	3	-1
1553288_a_at	C7orf51	1	1
1553292_s_at	FLJ25006	2	0
1553293_at	MRGPRX3	1	1
1553295_at	ABCA13	1	1
1553296_at	GPR128	1	1
1553297_a_at	CSF3R	1	1
1553298_at	C17orf77	1	1
1553299_at	RP4-621O15.2	3	-1
1553300_a_at	DGKH	2	0
1553301_a_at	TMEM182	2	0
1553303_at	C16orf46	1	1
1553304_at	LSM14B	2	0
1553306_at	CASP8	1	1
1553310_at	PLB1	1	1
1553311_at	C20orf197	2	0
1553313_s_at	SLC5A3	1	1
1553314_a_at	KIF19	1	1
1553315_at	SLFNL1	2	0
1553316_at	GPR82	1	1
1553317_s_at	GPR82	1	1
1553318_at	RIBC1	1	1
1553319_at	OXGR1	1	1
1553320_s_at	CDC14C	1	1
1553321_a_at	SULT1C4	1	1
1553322_s_at	TEAD1	2	0
1553323_a_at	CATSPER2	1	1
1553325_at	POU5F2	1	1
1553326_at	RXFP2	1	1
1553327_a_at	C10orf30	1	1
1553328_a_at	SLC18A2	2	0
1553329_at	C7orf45	1	1
1553330_at	C7orf45	3	-1
1553333_at	C1orf161	2	0
1553335_x_at	FLJ34047	1	1
1553336_a_at	MIER3	1	1
1553338_at	C1orf55	3	-1
1553340_s_at	AMAC1L2	1	1
1553341_at	UROC1	2	0
1553344_at	PCDH15	1	1
1553346_a_at	TNRC6A	2	0
1553347_s_at	KCNA6	1	1
1553348_a_at	NFX1	2	0
1553349_at	ARID2	1	1
1553350_at	FAM123C	2	0
1553351_at	OTUD7A	2	0
1553352_x_at	ERVWE1	3	-1
1553354_a_at	FLJ31958	1	1
1553355_at	NA	1	1
1553356_at	NA	1	1
1553357_at	FLJ30672	1	1
1553359_at	FBXL18	1	1
1553361_x_at	FBXL18	1	1
1553362_at	DNHL1	2	0
1553363_at	C6orf195	2	0
1553364_at	PNPLA1	2	0
1553365_at	DEPDC4	2	0
1553366_s_at	ANKRD23	1	1
1553367_a_at	COX6B2	1	1
1553369_at	FAM129C	1	1
1553371_at	EPHA10	1	1
1553372_at	FLJ23865	1	1
1553373_at	WDR64	1	1
1553374_at	PRO2949	2	0
1553375_at	BTBD9	3	-1
1553376_a_at	C1orf125	1	1
1553378_a_at	C17orf66	1	1
1553380_at	PARP15	3	-1
1553383_at	FLJ32810	2	0
1553385_at	FLJ14816	2	0
1553386_at	MFSD2	2	0
1553387_at	ATM	1	1
1553388_at	FAM26D	1	1
1553389_at	NPHP3	1	1
1553390_at	ATG9B	2	0
1553391_at	CXorf58	2	0
1553392_at	EFCAB3	2	0
1553394_a_at	TFAP2B	3	-1
1553395_a_at	CD200R1	1	1
1553396_a_at	CCDC13	1	1
1553397_at	CCDC13	1	1
1553398_at	NA	1	1
1553399_a_at	C17orf69	2	0
1553400_a_at	C17orf69	3	-1
1553401_at	MRGPRX1	1	1
1553402_a_at	HFE	1	1
1553403_at	RLN3	1	1
1553405_a_at	CSMD1	1	1
1553407_at	MACF1	2	0
1553409_at	ADAMTS20	2	0
1553410_a_at	ABCC12	2	0
1553411_s_at	SALL3	1	1
1553412_at	AGBL4	1	1
1553413_at	NA	2	0
1553415_at	SLC17A8	2	0
1553417_at	C11orf44	1	1
1553418_a_at	CNTNAP5	1	1
1553420_at	FLJ32063	1	1
1553422_s_at	A2BP1	2	0
1553423_a_at	SLFN13	2	0
1553424_at	C12orf40	1	1
1553425_at	WDR65	1	1
1553426_at	FLJ37543	1	1
1553427_at	ADAMTS15	2	0
1553428_at	RP3-398D13.1	1	1
1553429_at	FLJ31713	2	0
1553430_a_at	EDARADD	1	1
1553432_s_at	OTOA	1	1
1553433_at	C9orf93	1	1
1553434_at	CYP4Z2P	1	1
1553435_at	C18orf15	3	-1
1553436_at	NA	1	1
1553437_at	KLHDC7A	1	1
1553438_at	C11orf72	1	1
1553439_at	NA	1	1
1553440_at	C18orf16	1	1
1553441_at	CNTNAP4	3	-1
1553442_a_at	CNTNAP4	2	0
1553443_at	C8orf54	2	0
1553444_a_at	C1orf127	1	1
1553446_at	FLJ37396	1	1
1553447_at	AGBL1	1	1
1553448_at	FLJ34503	2	0
1553449_at	NA	2	0
1553450_s_at	NA	1	1
1553451_at	CCDC79	2	0
1553452_at	MYO1H	3	-1
1553453_at	ASB14	1	1
1553454_at	RPTN	1	1
1553456_at	FLJ30719	1	1
1553457_at	CXorf62	2	0
1553458_at	C10orf72	1	1
1553459_at	FLJ39660	1	1
1553460_at	C2orf61	1	1
1553461_at	FAM9B	1	1
1553462_at	NA	2	0
1553464_at	FLJ40288	1	1
1553465_a_at	CES7	1	1
1553466_at	CXorf59	1	1
1553467_at	FLJ32742	1	1
1553468_at	HYDIN	2	0
1553470_at	DNAH17	3	-1
1553471_at	AMAC1	1	1
1553472_at	FLJ32955	1	1
1553474_at	A26B3	2	0
1553475_at	PRO1483	1	1
1553478_at	PRR10	1	1
1553479_at	TMEM145	2	0
1553482_at	C15orf32	3	-1
1553483_at	TSGA10IP	1	1
1553484_at	FLJ32894	2	0
1553485_at	CCDC140	1	1
1553486_a_at	C17orf78	2	0
1553488_at	TEKT5	2	0
1553489_a_at	TEKT5	2	0
1553491_at	KSR2	1	1
1553492_a_at	PAX1	1	1
1553493_a_at	TDH	2	0
1553494_at	TDH	3	-1
1553497_at	C12orf37	1	1
1553498_at	NA	1	1
1553499_s_at	SERPINA9	1	1
1553500_at	FBXL21	2	0
1553502_a_at	PALM2	1	1
1553504_at	MRGPRX4	1	1
1553505_at	A2ML1	3	-1
1553506_at	CPO	1	1
1553507_a_at	GPR6	2	0
1553508_at	MDS2	1	1
1553510_s_at	RQCD1	1	1
1553511_at	GJD3	1	1
1553512_at	HOXC12	3	-1
1553513_at	VNN3	2	0
1553514_a_at	VNN3	2	0
1553515_at	MYEOV2	1	1
1553517_at	FERD3L	2	0
1553518_at	DEFT1P	2	0
1553519_at	C21orf94	1	1
1553521_at	DEFB104A	2	0
1553523_at	NLRP14	3	-1
1553524_at	DGKB	1	1
1553525_at	NLRP13	3	-1
1553526_at	NLRP8	3	-1
1553527_at	NLRP9	3	-1
1553528_a_at	TAF5	3	-1
1553529_at	TAS1R2	2	0
1553530_a_at	ITGB1	1	1
1553531_at	PCSK6	2	0
1553532_a_at	ZNF341	2	0
1553533_at	JPH1	2	0
1553534_at	NLRP10	1	1
1553535_a_at	RANGAP1	1	1
1553536_at	NA	1	1
1553537_at	KRT73	2	0
1553538_s_at	NA	1	1
1553539_at	KRT74	2	0
1553540_a_at	SLC29A2	1	1
1553541_at	LMX1A	1	1
1553542_at	CCDC125	2	0
1553544_at	GPR101	1	1
1553545_at	ILDR1	1	1
1553546_at	PRO2012	2	0
1553547_at	NA	3	-1
1553549_at	VN1R2	1	1
1553550_at	VN1R5	2	0
1553551_s_at	NA	1	1
1553552_at	TAAR8	1	1
1553553_at	TAS2R39	1	1
1553555_at	TAS2R38	1	1
1553556_at	TAS2R40	1	1
1553558_at	TAS2R41	1	1
1553559_at	TMEM171	3	-1
1553560_at	VN1R4	1	1
1553561_at	TAS2R50	1	1
1553562_at	CD8B	1	1
1553564_at	MACROD2	3	-1
1553565_s_at	DDAH1	1	1
1553566_at	C12orf53	1	1
1553567_s_at	ATP13A5	1	1
1553568_a_at	HIST1H1T	1	1
1553569_at	OAF	1	1
1553570_x_at	OAF	1	1
1553572_a_at	CYGB	1	1
1553573_s_at	EFNA2	2	0
1553574_at	IFNE1	2	0
1553575_at	NA	2	0
1553579_a_at	SPAG11B	1	1
1553581_s_at	SFRS12IP1	3	-1
1553582_a_at	SPAG11B	1	1
1553583_a_at	THRSP	1	1
1553584_at	NA	1	1
1553585_a_at	MAGEA5	1	1
1553586_at	LOC283932	2	0
1553587_a_at	POLE4	3	-1
1553588_at	NA	1	1
1553589_a_at	PDZK1IP1	2	0
1553590_at	FAM27E3	2	0
1553591_at	LOC727996	1	1
1553592_x_at	LOC727996	1	1
1553593_a_at	TAL2	1	1
1553594_a_at	INSL3	2	0
1553599_a_at	SYCP3	3	-1
1553600_at	TMIE	1	1
1553601_a_at	TMIE	2	0
1553602_at	MUCL1	1	1
1553603_s_at	ARL6IP2	3	-1
1553604_at	ABCA13	3	-1
1553605_a_at	ABCA13	2	0
1553607_at	C21orf109	3	-1
1553608_a_at	C21orf109	3	-1
1553611_s_at	FLJ33790	3	-1
1553612_at	ZNF354B	1	1
1553613_s_at	FOXC1	2	0
1553614_a_at	FLJ25694	2	0
1553618_at	TRIM43	3	-1
1553619_a_at	TRIM43	3	-1
1553620_at	TRIM42	2	0
1553622_a_at	FSIP1	2	0
1553623_at	MGC15705	2	0
1553625_at	FAM98B	1	1
1553626_a_at	C17orf57	1	1
1553627_s_at	C17orf57	1	1
1553629_a_at	FAM71B	1	1
1553630_at	C10orf107	1	1
1553633_s_at	NHEDC1	2	0
1553634_a_at	FLJ40852	1	1
1553635_s_at	TCTEX1D1	1	1
1553636_at	TMCO5	1	1
1553637_s_at	TMCO5	1	1
1553639_a_at	PPARGC1B	3	-1
1553640_at	XKR6	2	0
1553641_a_at	TSGA13	1	1
1553642_at	C9orf163	1	1
1553644_at	C14orf49	1	1
1553645_at	CCDC141	3	-1
1553646_at	HDX	1	1
1553647_at	CDYL2	1	1
1553651_at	C18orf54	2	0
1553652_a_at	C18orf54	2	0
1553654_at	SYT14	2	0
1553655_at	CDC20B	2	0
1553656_at	TECTB	1	1
1553657_at	VWA3A	1	1
1553658_at	FLJ32575	1	1
1553660_at	HUS1B	2	0
1553661_a_at	HUS1B	2	0
1553663_a_at	NPB	1	1
1553666_at	CCDC34	1	1
1553668_at	LRCH3	1	1
1553670_at	INTS4	2	0
1553672_at	ENAH	3	-1
1553673_at	STK35	2	0
1553674_at	LRRC44	2	0
1553675_at	KLC4	2	0
1553677_a_at	TIPRL	3	-1
1553678_a_at	ITGB1	1	1
1553679_s_at	VKORC1L1	2	0
1553681_a_at	PRF1	1	1
1553682_at	FBXL14	1	1
1553683_s_at	FBXL14	1	1
1553684_at	PPIL6	2	0
1553685_s_at	SP1	1	1
1553686_at	C18orf25	3	-1
1553688_at	METTL6	1	1
1553689_s_at	METTL6	2	0
1553690_at	SGOL1	2	0
1553691_at	B3GALNT2	3	-1
1553693_s_at	CBR4	1	1
1553694_a_at	PIK3C2A	2	0
1553695_a_at	NLRX1	1	1
1553696_s_at	ZNF569	3	-1
1553697_at	C1orf96	3	-1
1553698_a_at	C1orf96	2	0
1553701_a_at	DUSP18	2	0
1553702_at	ZNF697	2	0
1553703_at	ZNF791	2	0
1553704_x_at	ZNF791	2	0
1553705_a_at	CHRM3	1	1
1553706_at	HTRA4	1	1
1553708_at	MGC16075	1	1
1553709_a_at	PRPF38A	3	-1
1553710_at	C4orf39	1	1
1553711_a_at	C4orf39	1	1
1553713_a_at	RHEBL1	3	-1
1553715_s_at	C16orf14	2	0
1553717_at	KCTD7	1	1
1553718_at	ZNF548	1	1
1553719_s_at	ZNF548	3	-1
1553720_a_at	FAM123A	2	0
1553721_at	RNF152	3	-1
1553722_s_at	RNF152	2	0
1553723_at	GPR97	3	-1
1553725_s_at	ZNF644	1	1
1553726_s_at	C6orf170	2	0
1553727_at	B4GALNT3	1	1
1553728_at	LRRC43	1	1
1553729_s_at	LRRC43	2	0
1553730_x_at	LRRC43	1	1
1553732_s_at	CCDC123	1	1
1553734_at	AK7	2	0
1553736_at	CCDC131	3	-1
1553739_at	IRAK2	2	0
1553740_a_at	IRAK2	1	1
1553741_at	C1orf211	1	1
1553743_at	FAM119A	1	1
1553746_a_at	C12orf64	3	-1
1553747_at	MGC16025	1	1
1553749_at	FAM76B	3	-1
1553750_a_at	FAM76B	2	0
1553752_at	C20orf165	1	1
1553755_at	NXNL1	1	1
1553756_at	C9orf70	2	0
1553757_at	IQCG	1	1
1553759_at	MCM9	2	0
1553761_at	C22orf30	1	1
1553764_a_at	JUB	2	0
1553765_a_at	KLHL32	3	-1
1553768_a_at	DCBLD1	3	-1
1553769_at	SLAMF9	1	1
1553770_a_at	SLAMF9	1	1
1553772_at	GK5	2	0
1553775_at	FLJ31715	1	1
1553776_at	UBE2U	2	0
1553778_at	WBSCR27	2	0
1553780_at	MGC23270	2	0
1553781_at	ZC3HAV1L	2	0
1553785_at	RASGEF1B	1	1
1553787_at	C11orf45	2	0
1553789_a_at	C21orf58	1	1
1553792_at	KIAA1109	3	-1
1553793_a_at	KIAA1109	2	0
1553794_at	STOML3	1	1
1553796_at	FLJ30594	2	0
1553797_a_at	FLJ30594	2	0
1553798_a_at	FBXL13	2	0
1553799_at	C15orf33	3	-1
1553801_a_at	C14orf126	1	1
1553802_a_at	SOX3	1	1
1553803_at	C17orf46	1	1
1553804_a_at	C17orf46	1	1
1553805_at	C3orf49	1	1
1553808_a_at	NKX2-3	3	-1
1553809_a_at	C9orf71	3	-1
1553810_a_at	KIAA1524	3	-1
1553811_at	MGC14436	2	0
1553812_at	TLE6	3	-1
1553813_s_at	TLE6	3	-1
1553815_a_at	LOC170082	3	-1
1553817_at	POM121L1	2	0
1553818_x_at	POM121L1	2	0
1553821_at	NA	2	0
1553822_at	RTP1	3	-1
1553823_a_at	RTP1	2	0
1553826_a_at	LOC146325	1	1
1553828_at	FAM55A	1	1
1553829_at	C2orf58	2	0
1553830_s_at	MAGEA2	3	-1
1553831_at	APOBEC3D	1	1
1553832_at	C21orf93	1	1
1553834_at	COL29A1	3	-1
1553835_a_at	COL29A1	2	0
1553837_at	PGAM5	2	0
1553838_at	FLJ25371	2	0
1553839_at	CCDC149	1	1
1553840_a_at	CCDC149	1	1
1553842_at	CXorf20	2	0
1553843_at	C10orf67	3	-1
1553844_a_at	C10orf67	1	1
1553845_x_at	C10orf67	2	0
1553846_at	SPERT	1	1
1553847_a_at	SPERT	1	1
1553849_at	CCDC26	2	0
1553850_at	C21orf88	1	1
1553851_at	SPIC	1	1
1553852_at	VPS13B	2	0
1553856_s_at	P2RY10	1	1
1553857_at	IGSF22	1	1
1553858_at	ZBTB3	2	0
1553859_at	TPH1	1	1
1553860_at	DCST1	1	1
1553861_at	TCP11L2	1	1
1553863_at	C10orf64	1	1
1553864_at	DKFZp761H2121	1	1
1553865_a_at	DKFZp761H2121	1	1
1553868_a_at	C5orf36	2	0
1553869_at	SESN3	2	0
1553871_at	C19orf34	1	1
1553872_at	MGC33894	1	1
1553873_at	KLHL34	2	0
1553874_a_at	ZSCAN10	2	0
1553875_s_at	ZSCAN10	1	1
1553876_at	SAMD3	1	1
1553878_at	GOT1L1	1	1
1553879_a_at	GOT1L1	1	1
1553880_at	C10orf91	2	0
1553881_at	MGC16142	1	1
1553882_at	NA	2	0
1553883_at	ZNF99	1	1
1553885_x_at	ZNF99	2	0
1553886_at	CCDC108	1	1
1553887_at	FLJ40235	1	1
1553888_at	LDHAL6A	3	-1
1553889_at	MRGPRX2	1	1
1553890_s_at	LOC126147	1	1
1553891_at	KLF17	2	0
1553893_at	CCDC105	2	0
1553894_at	CCDC122	1	1
1553895_at	C11orf42	1	1
1553898_a_at	DKFZp434L192	2	0
1553900_s_at	DKFZP434P211	2	0
1553901_x_at	ZNF486	2	0
1553905_at	CXorf22	2	0
1553906_s_at	FGD2	1	1
1553907_a_at	EXDL1	2	0
1553909_x_at	C10orf6	3	-1
1553910_at	NBPF4	1	1
1553911_at	ZNF663	1	1
1553912_at	FLJ35424	1	1
1553914_at	MGC34800	1	1
1553915_at	C10orf126	1	1
1553917_at	PIP5K3	1	1
1553918_at	C21orf129	3	-1
1553919_at	C9orf62	1	1
1553920_at	C9orf84	3	-1
1553923_at	SLC22A24	2	0
1553924_at	FMO9P	2	0
1553927_at	C7orf33	1	1
1553928_at	ELMOD2	3	-1
1553929_at	ASAH3	2	0
1553930_at	TAAR1	1	1
1553931_at	LOC202459	1	1
1553934_at	C18orf20	1	1
1553935_at	MGC2848	2	0
1553936_a_at	MGC2848	3	-1
1553938_a_at	STK32A	2	0
1553940_a_at	LRRC28	2	0
1553943_at	NS3BP	1	1
1553944_at	MIA2	1	1
1553945_at	GPHB5	2	0
1553946_at	DCD	1	1
1553947_at	EXOSC6	1	1
1553949_at	LOC728056	1	1
1553952_at	ZDHHC19	1	1
1553954_at	ALG14	1	1
1553955_at	CCDC128	2	0
1553956_at	ALS2CR4	3	-1
1553957_at	ZNF564	2	0
1553959_a_at	B3GALT6	3	-1
1553960_at	SNX21	2	0
1553961_s_at	SNX21	1	1
1553962_s_at	RHOB	1	1
1553963_at	RHOB	2	0
1553965_x_at	RHOB	1	1
1553967_at	SCAMP4	1	1
1553968_a_at	SCAMP4	3	-1
1553970_s_at	CEL	2	0
1553971_a_at	GATS	1	1
1553972_a_at	CBS	2	0
1553973_a_at	SPINK6	1	1
1553974_at	C22orf39	1	1
1553976_a_at	RP11-529I10.4	2	0
1553977_a_at	CYP39A1	1	1
1553978_at	MEF2B	2	0
1553979_at	NA	3	-1
1553982_a_at	RAB7B	2	0
1553983_at	DTYMK	2	0
1553984_s_at	DTYMK	3	-1
1553986_at	RASEF	3	-1
1553987_at	C12orf47	2	0
1553989_a_at	ATP6V1C2	3	-1
1553990_at	C16orf79	1	1
1553991_s_at	FLJ20674	1	1
1553992_s_at	NBR2	2	0
1553993_s_at	MED25	3	-1
1553994_at	NT5E	1	1
1553995_a_at	NT5E	1	1
1553997_a_at	ASPHD1	1	1
1553998_at	DMRTC1	1	1
1554001_at	TRIM37	2	0
1554003_at	RGNEF	1	1
1554004_a_at	RGNEF	2	0
1554006_a_at	LLGL2	2	0
1554007_at	ZNF483	2	0
1554008_at	OSMR	1	1
1554010_at	NDST1	2	0
1554012_at	RSPO2	3	-1
1554014_at	CHD2	3	-1
1554015_a_at	CHD2	3	-1
1554016_a_at	C16orf57	3	-1
1554017_at	RILPL1	1	1
1554018_at	GPNMB	2	0
1554019_s_at	C6orf182	3	-1
1554020_at	BICD1	3	-1
1554021_a_at	ZNF12	2	0
1554022_at	CCDC13	1	1
1554023_s_at	CCDC13	1	1
1554026_a_at	MYO10	3	-1
1554027_a_at	SLC4A4	2	0
1554029_a_at	KIAA0372	1	1
1554030_at	ARSB	2	0
1554032_at	ARSB	1	1
1554033_at	FRMD4A	2	0
1554034_a_at	FRMD4A	2	0
1554036_at	ZBTB24	3	-1
1554037_a_at	ZBTB24	3	-1
1554038_at	LARP2	1	1
1554039_at	C14orf159	1	1
1554041_at	C20orf141	2	0
1554042_s_at	C20orf141	1	1
1554043_a_at	NA	2	0
1554044_a_at	MRAP	1	1
1554045_at	ZNF24	3	-1
1554047_at	TXNDC9	1	1
1554049_s_at	WDR42A	1	1
1554050_at	SMPDL3B	1	1
1554052_at	CNOT1	1	1
1554053_at	SPTLC1	3	-1
1554057_at	LOC645676	2	0
1554059_at	SETMAR	2	0
1554060_s_at	SETMAR	1	1
1554062_at	XG	2	0
1554063_at	C8orf76	3	-1
1554065_at	FAM125B	1	1
1554067_at	FLJ32549	2	0
1554068_s_at	FLJ32549	1	1
1554069_at	EPHA8	3	-1
1554071_at	CCDC67	2	0
1554072_s_at	CCDC67	1	1
1554074_s_at	SLFNL1	1	1
1554076_s_at	TMEM136	1	1
1554077_a_at	TMEM53	2	0
1554078_s_at	DNAJA3	2	0
1554079_at	GALNTL4	2	0
1554080_at	RQCD1	3	-1
1554082_a_at	NOL9	3	-1
1554084_a_at	NOL9	3	-1
1554085_at	DDX51	3	-1
1554086_at	TUBGCP3	2	0
1554089_s_at	SBDSP	1	1
1554091_a_at	TIRAP	1	1
1554093_a_at	SNAPC5	2	0
1554094_at	ENTPD5	1	1
1554095_at	RBM33	3	-1
1554096_a_at	RBM33	3	-1
1554097_a_at	LOC554202	1	1
1554098_at	SPIN3	1	1
1554099_a_at	SPIN3	1	1
1554101_a_at	TMTC4	2	0
1554102_a_at	TMTC4	1	1
1554103_at	NA	2	0
1554105_at	TMEM185A	3	-1
1554106_at	ALS2CR16	2	0
1554108_at	ALS2CR16	1	1
1554110_at	CDCP1	1	1
1554112_a_at	ULK2	2	0
1554113_a_at	SLC4A8	1	1
1554114_s_at	SSH2	1	1
1554115_at	LOC133874	2	0
1554116_s_at	PARP11	1	1
1554117_at	CCDC60	1	1
1554119_at	C16orf57	1	1
1554121_at	HSD17B12	2	0
1554122_a_at	HSD17B12	1	1
1554125_a_at	NLGN4Y	2	0
1554126_at	MSRB3	1	1
1554127_s_at	MSRB3	2	0
1554128_at	ADIG	1	1
1554129_a_at	ADIG	1	1
1554131_at	KIAA1128	3	-1
1554132_a_at	KIAA1128	3	-1
1554133_at	RUFY2	2	0
1554140_at	WDR78	2	0
1554141_s_at	WDR78	2	0
1554142_at	SUGT1L1	2	0
1554143_a_at	SUGT1L1	1	1
1554145_a_at	CCDC128	1	1
1554147_s_at	C3orf15	1	1
1554148_a_at	SLC33A1	2	0
1554149_at	CLDND1	2	0
1554151_at	OGDH	2	0
1554152_a_at	OGDH	1	1
1554153_a_at	PHF21A	3	-1
1554154_at	GDAP2	1	1
1554155_at	MCPH1	2	0
1554156_a_at	WFDC8	3	-1
1554157_a_at	WFDC8	1	1
1554158_at	ZMYND11	3	-1
1554159_a_at	ZMYND11	1	1
1554160_a_at	ZNF446	2	0
1554161_at	SLC25A27	1	1
1554163_at	TWIST2	2	0
1554165_at	FAM53B	3	-1
1554167_a_at	GOLGA7	3	-1
1554168_a_at	SH3KBP1	3	-1
1554170_a_at	LOC255374	1	1
1554171_at	ZMYM3	2	0
1554172_a_at	ZMYM3	2	0
1554173_at	CD300LB	1	1
1554175_at	CD300LB	1	1
1554176_a_at	C3orf33	3	-1
1554177_a_at	ATP5S	1	1
1554178_a_at	FAM126B	1	1
1554179_s_at	LYNX1	1	1
1554181_at	SNX32	2	0
1554182_at	TRIM74	1	1
1554183_s_at	TRIM74	1	1
1554185_at	LOC554206	2	0
1554187_at	LOC554206	1	1
1554188_at	C11orf53	1	1
1554190_s_at	C10orf81	1	1
1554192_s_at	C4orf23	2	0
1554193_s_at	MANEA	2	0
1554194_at	NA	2	0
1554195_a_at	MGC23985	1	1
1554196_at	IZUMO1	2	0
1554198_at	SH3YL1	1	1
1554199_at	PTPRO	1	1
1554201_at	CABP4	1	1
1554202_x_at	CABP4	1	1
1554203_at	C21orf9	2	0
1554205_s_at	ICA1L	3	-1
1554206_at	TMLHE	3	-1
1554208_at	MEI1	1	1
1554210_at	ZCCHC13	1	1
1554212_s_at	KCNS2	1	1
1554213_at	ARHGEF10	1	1
1554214_at	NA	2	0
1554216_at	CCDC132	3	-1
1554217_a_at	CCDC132	3	-1
1554219_at	NA	1	1
1554220_a_at	SMOX	2	0
1554222_at	MGC45922	1	1
1554224_at	NA	1	1
1554225_a_at	NA	1	1
1554228_a_at	C8orf56	2	0
1554229_at	C5orf41	2	0
1554231_a_at	ZNF396	1	1
1554232_a_at	NA	1	1
1554233_at	C1QTNF9	1	1
1554234_at	KATNAL2	1	1
1554235_at	CTNNA3	1	1
1554237_at	SDCCAG8	2	0
1554239_s_at	ZADH2	1	1
1554240_a_at	ITGAL	1	1
1554241_at	COCH	2	0
1554242_a_at	COCH	2	0
1554245_x_at	ARL17	1	1
1554246_at	C1orf210	1	1
1554248_at	ZNF638	3	-1
1554249_a_at	ZNF638	2	0
1554250_s_at	TRIM73	2	0
1554251_at	HP1BP3	3	-1
1554252_a_at	LASS3	1	1
1554253_a_at	LASS3	1	1
1554256_a_at	PCNXL2	2	0
1554258_a_at	DNAJC5B	2	0
1554259_at	GPSM1	1	1
1554260_a_at	FRYL	2	0
1554261_at	KLHL29	1	1
1554262_s_at	KLHL29	2	0
1554264_at	CKAP2	3	-1
1554266_at	NA	2	0
1554268_at	MORN1	2	0
1554271_a_at	CENPL	2	0
1554272_at	ERAP2	1	1
1554273_a_at	ERAP2	1	1
1554274_a_at	SSH1	1	1
1554276_at	SART3	2	0
1554277_s_at	FANCM	3	-1
1554279_a_at	CXorf34	1	1
1554280_a_at	C9orf43	2	0
1554281_at	NA	1	1
1554283_at	CCRN4L	3	-1
1554285_at	HAVCR2	1	1
1554286_at	FLJ25758	2	0
1554287_at	TRIM4	1	1
1554288_at	KIAA1600	2	0
1554290_at	HERC3	1	1
1554291_at	UHRF1BP1L	2	0
1554292_a_at	UHRF1BP1L	2	0
1554293_at	TTBK2	2	0
1554294_s_at	TTBK2	2	0
1554295_x_at	TTBK2	2	0
1554296_at	CYP19A1	2	0
1554298_a_at	WDR49	3	-1
1554299_at	NPAS4	2	0
1554300_a_at	SVOPL	3	-1
1554301_at	LOC645591	1	1
1554302_s_at	LOC645591	1	1
1554303_at	HNMT	1	1
1554305_at	MGC20647	1	1
1554306_at	ITPKB	1	1
1554307_at	LOC644852	2	0
1554308_s_at	GABRA2	1	1
1554309_at	EIF4G3	2	0
1554310_a_at	EIF4G3	2	0
1554311_a_at	SUPT6H	2	0
1554312_at	RNF170	1	1
1554314_at	C6orf141	1	1
1554316_at	PGLS	1	1
1554317_s_at	C14orf172	3	-1
1554318_at	LOC541473	1	1
1554319_at	RPS6KA5	3	-1
1554321_a_at	NFS1	1	1
1554322_a_at	HDAC4	1	1
1554324_s_at	DYNC2LI1	1	1
1554325_at	DOCK2	2	0
1554327_a_at	CANT1	2	0
1554328_at	STXBP4	1	1
1554329_x_at	STXBP4	2	0
1554331_a_at	LRRC18	1	1
1554332_a_at	LOC100135777	2	0
1554333_at	DNAJA4	2	0
1554334_a_at	DNAJA4	2	0
1554335_at	PSCD4	1	1
1554337_at	FARP2	2	0
1554339_a_at	COG3	2	0
1554340_a_at	C1orf187	2	0
1554341_a_at	HEL308	2	0
1554342_s_at	HEL308	2	0
1554343_a_at	STAP1	1	1
1554344_s_at	AQP12A	1	1
1554345_a_at	GIN1	3	-1
1554346_at	GNB5	2	0
1554348_s_at	CDKN2AIPNL	1	1
1554349_at	XRCC6BP1	2	0
1554351_a_at	TIPRL	2	0
1554352_s_at	DENND4A	3	-1
1554354_at	SIAE	1	1
1554355_a_at	SIAE	1	1
1554356_at	GINS4	2	0
1554360_at	FCHSD2	1	1
1554362_at	BTG4	3	-1
1554364_at	PPP2R5C	3	-1
1554365_a_at	PPP2R5C	2	0
1554367_at	FAM26C	1	1
1554368_at	NT5C1B	2	0
1554371_at	PKD1L2	1	1
1554372_at	NA	1	1
1554374_at	NA	2	0
1554375_a_at	NR1H4	2	0
1554376_s_at	PTPLA	3	-1
1554377_a_at	CNTNAP4	2	0
1554378_a_at	PDE1C	1	1
1554379_a_at	TP73	2	0
1554380_at	NEK11	1	1
1554382_at	LOC200261	1	1
1554383_a_at	TRAM2	2	0
1554384_at	PADI2	2	0
1554385_a_at	PADI2	1	1
1554386_at	CST9	2	0
1554388_at	VPS29	1	1
1554390_s_at	ACTR2	3	-1
1554391_at	TBK1	2	0
1554393_a_at	ADC	2	0
1554394_at	NELL1	1	1
1554396_at	UEVLD	1	1
1554397_s_at	UEVLD	2	0
1554398_at	LYG2	2	0
1554400_at	TCTE3	1	1
1554401_a_at	TCTE3	2	0
1554403_a_at	NA	1	1
1554404_a_at	NA	2	0
1554405_a_at	C21orf100	1	1
1554406_a_at	CLEC7A	1	1
1554408_a_at	TK1	3	-1
1554409_at	WBSCR16	1	1
1554410_a_at	WBSCR16	2	0
1554411_at	CTNNB1	1	1
1554413_s_at	RUNDC2B	2	0
1554414_a_at	OSGIN2	1	1
1554415_at	TAF5L	3	-1
1554417_s_at	APH1A	1	1
1554418_s_at	SPOCK3	2	0
1554419_x_at	GGNBP2	1	1
1554420_at	ATF3	1	1
1554423_a_at	FBXO7	2	0
1554424_at	FIP1L1	3	-1
1554428_s_at	NLGN2	1	1
1554429_a_at	DMWD	1	1
1554430_at	C21orf51	1	1
1554432_x_at	C21orf51	1	1
1554433_a_at	ZNF146	1	1
1554436_a_at	REG4	2	0
1554438_at	KIAA1217	1	1
1554440_at	KIAA0513	2	0
1554441_a_at	WAPAL	3	-1
1554442_at	BEST1	1	1
1554443_s_at	BEST1	1	1
1554444_s_at	C2orf18	1	1
1554445_at	ZNF85	3	-1
1554447_at	LOC554203	1	1
1554448_at	LOC554203	1	1
1554449_at	MIER3	2	0
1554450_s_at	MIER3	2	0
1554451_s_at	DNAJC14	2	0
1554452_a_at	HIG2	3	-1
1554453_at	HNRPLL	2	0
1554455_at	LINS1	2	0
1554456_a_at	LINS1	2	0
1554459_s_at	CFHR3	2	0
1554460_at	ST8SIA4	3	-1
1554462_a_at	DNAJB9	1	1
1554464_a_at	CRTAP	1	1
1554465_s_at	ZNF673	2	0
1554466_a_at	C16orf13	1	1
1554468_s_at	MRPL38	1	1
1554469_at	ZBTB44	2	0
1554470_s_at	ZBTB44	1	1
1554471_a_at	ANKRD13C	2	0
1554472_a_at	PHF20L1	2	0
1554473_at	SRGAP1	1	1
1554474_a_at	MOXD1	1	1
1554475_a_at	C19orf47	1	1
1554476_x_at	ZNF808	2	0
1554478_a_at	HEATR3	2	0
1554479_a_at	CARD8	1	1
1554480_a_at	ARMC10	2	0
1554481_a_at	EPB41	2	0
1554482_a_at	SAR1B	1	1
1554483_at	TMEM37	1	1
1554485_s_at	TMEM37	2	0
1554486_a_at	C6orf114	3	-1
1554487_a_at	CREBL1	1	1
1554488_at	CEP70	1	1
1554489_a_at	CEP70	2	0
1554491_a_at	SERPINC1	2	0
1554492_at	THADA	3	-1
1554493_s_at	THADA	1	1
1554494_at	MTHFSD	2	0
1554495_s_at	MTHFSD	1	1
1554496_at	RAD51L1	1	1
1554499_s_at	PPA2	2	0
1554500_a_at	RGS7	2	0
1554501_at	TSC22D4	1	1
1554503_a_at	OSCAR	1	1
1554504_at	NAALAD2	1	1
1554506_x_at	NAALAD2	2	0
1554507_at	NAALAD2	2	0
1554508_at	PIK3AP1	2	0
1554509_a_at	C10orf97	2	0
1554510_s_at	GHITM	1	1
1554511_at	WWC1	1	1
1554512_a_at	CCDC123	1	1
1554513_s_at	CCDC123	2	0
1554514_at	ACSM5	1	1
1554516_at	NA	1	1
1554517_x_at	NA	1	1
1554518_at	GSTCD	2	0
1554519_at	CD80	1	1
1554520_at	LOC283861	1	1
1554522_at	CNNM2	3	-1
1554523_a_at	CNNM2	1	1
1554524_a_at	OLFM3	1	1
1554526_at	OLFM3	2	0
1554528_at	C3orf15	1	1
1554530_at	VSTM2A	1	1
1554531_at	TTC12	1	1
1554533_at	C2	2	0
1554534_at	DPYD	1	1
1554536_at	DPYD	2	0
1554537_at	TMEM126B	1	1
1554538_at	RHOF	2	0
1554539_a_at	RHOF	2	0
1554540_at	C1orf67	1	1
1554541_a_at	GPRIN2	2	0
1554542_at	LOC153328	1	1
1554543_at	SPAG9	1	1
1554544_a_at	MBP	2	0
1554545_at	APOBEC4	1	1
1554547_at	FAM13C1	1	1
1554549_a_at	WDR20	3	-1
1554550_at	KIAA1430	2	0
1554553_s_at	YIF1B	1	1
1554554_at	CCDC57	1	1
1554555_a_at	SETD6	3	-1
1554556_a_at	ATP11B	1	1
1554557_at	ATP11B	2	0
1554558_at	WDR22	2	0
1554559_at	GPR62	1	1
1554560_at	PGM5	1	1
1554564_a_at	UNQ1887	2	0
1554565_x_at	UNQ1887	1	1
1554566_at	KCTD17	1	1
1554568_at	DYNLRB1	3	-1
1554569_a_at	CUGBP2	2	0
1554571_at	APBB1IP	1	1
1554572_a_at	SUV39H2	3	-1
1554574_a_at	CYB5R3	1	1
1554575_a_at	BPNT1	2	0
1554576_a_at	ETV4	1	1
1554577_a_at	PSMD10	1	1
1554578_at	ZNF70	1	1
1554579_a_at	MYO18B	1	1
1554580_a_at	WWP2	1	1
1554582_a_at	MGC50559	1	1
1554583_a_at	MGC50559	1	1
1554584_at	LRRC48	2	0
1554586_a_at	RHOBTB2	1	1
1554588_a_at	TTC30B	2	0
1554589_at	LENG9	1	1
1554591_at	GDEP	1	1
1554592_a_at	SLC1A6	1	1
1554593_s_at	SLC1A6	1	1
1554594_at	LOC201175	2	0
1554595_at	SYMPK	2	0
1554597_at	NA	2	0
1554599_x_at	NA	2	0
1554600_s_at	LMNA	2	0
1554601_at	NKAIN2	1	1
1554602_at	RBM8A	1	1
1554604_at	MBTPS2	2	0
1554606_at	CCDC100	2	0
1554607_at	CNKSR2	1	1
1554608_at	TGOLN2	2	0
1554609_at	POLD3	3	-1
1554610_at	ANKMY1	1	1
1554612_at	KIAA0226	2	0
1554613_a_at	KIAA0226	1	1
1554614_a_at	PTBP2	1	1
1554615_at	NA	2	0
1554616_at	SERPINB8	1	1
1554618_at	HRBL	1	1
1554619_at	LOC153364	1	1
1554621_at	DGKE	2	0
1554623_x_at	DGKE	1	1
1554624_a_at	SIRPB1	1	1
1554625_at	BCL6B	1	1
1554627_a_at	ASCC1	1	1
1554628_at	ZNF57	3	-1
1554629_at	EPHA7	1	1
1554631_at	ATM	2	0
1554633_a_at	MYT1L	2	0
1554634_at	PDS5B	1	1
1554635_a_at	NPAS3	2	0
1554636_at	NA	1	1
1554637_a_at	CBFA2T2	1	1
1554638_at	ZFYVE16	1	1
1554640_at	PALM2	1	1
1554641_a_at	TET3	2	0
1554642_at	RNF32	1	1
1554643_at	RGS11	2	0
1554646_at	OSBPL1A	1	1
1554648_a_at	DUOXA1	1	1
1554649_at	NA	2	0
1554650_a_at	NA	1	1
1554652_s_at	MAST4	3	-1
1554655_a_at	RPRML	2	0
1554657_a_at	C20orf26	1	1
1554659_at	NEK4	1	1
1554660_a_at	C1orf71	3	-1
1554661_s_at	C1orf71	3	-1
1554662_at	C17orf47	1	1
1554663_a_at	NUMA1	1	1
1554664_at	C9orf90	2	0
1554665_at	ZNF587	2	0
1554666_at	LOC100130950	1	1
1554667_s_at	METTL8	3	-1
1554668_a_at	FAM151A	2	0
1554670_at	GGA1	2	0
1554671_a_at	SRRM2	2	0
1554672_at	TTC26	1	1
1554675_a_at	SYCE1	2	0
1554676_at	SRGN	2	0
1554677_s_at	CMTM4	3	-1
1554678_s_at	HNRPDL	2	0
1554679_a_at	LAPTM4B	1	1
1554680_s_at	KCNS2	1	1
1554681_a_at	MGC50722	1	1
1554683_a_at	MGC50722	2	0
1554685_a_at	KIAA1199	1	1
1554686_at	STAU2	2	0
1554689_a_at	NLGN4X	2	0
1554690_a_at	TACC1	3	-1
1554691_a_at	PACSIN2	1	1
1554692_at	SLC23A2	1	1
1554694_at	CCNY	2	0
1554696_s_at	TYMS	3	-1
1554697_at	ADAMTS9	1	1
1554699_at	L3MBTL4	1	1
1554700_at	CDH7	2	0
1554701_a_at	TBC1D16	1	1
1554702_at	NALCN	2	0
1554703_at	ARHGEF10	2	0
1554704_at	ATP8B3	1	1
1554705_at	SCARA5	3	-1
1554706_at	OR2L13	2	0
1554707_at	C9orf68	3	-1
1554708_s_at	C9orf68	3	-1
1554710_at	KCNMB1	2	0
1554711_at	FAM26A	2	0
1554712_a_at	GLYATL2	1	1
1554714_at	RELL1	2	0
1554715_at	C15orf50	1	1
1554716_s_at	C15orf50	1	1
1554717_a_at	PDE4D	1	1
1554719_at	NDUFA10	3	-1
1554721_a_at	TAF2	1	1
1554722_at	TRPM3	1	1
1554723_x_at	NA	2	0
1554724_at	SLC6A11	3	-1
1554725_at	RABGAP1L	2	0
1554726_at	ZNF655	2	0
1554728_at	SLC9A1	2	0
1554730_at	MCTP1	1	1
1554732_at	MGC24125	1	1
1554733_at	MGC24125	1	1
1554735_a_at	TRIM7	2	0
1554736_at	ARHGAP29	1	1
1554737_at	FBN2	1	1
1554739_at	IPP	2	0
1554740_a_at	IPP	2	0
1554741_s_at	KGFLP1	1	1
1554742_at	PMS1	2	0
1554743_x_at	PMS1	2	0
1554744_at	COP1	1	1
1554745_at	RALGPS1	1	1
1554747_a_at	2002-09-01	2	0
1554748_at	CLCNKB	2	0
1554749_s_at	CLCNKB	1	1
1554751_at	NA	2	0
1554752_a_at	NA	1	1
1554755_a_at	KIAA0774	2	0
1554757_a_at	INPP5A	1	1
1554758_a_at	CD99L2	1	1
1554759_at	SNIP	1	1
1554761_a_at	HEATR2	3	-1
1554762_a_at	WWC2	2	0
1554763_at	UBE2DNL	1	1
1554764_a_at	C11orf64	2	0
1554765_a_at	C11orf64	1	1
1554766_s_at	PVT1	2	0
1554767_s_at	CRYZL1	1	1
1554768_a_at	MAD2L1	3	-1
1554769_at	ZNF785	1	1
1554770_x_at	ZNF785	1	1
1554771_at	NA	3	-1
1554772_at	C17orf57	1	1
1554773_at	WFIKKN2	2	0
1554774_at	MINA	3	-1
1554776_at	ZFP42	2	0
1554777_at	ZFP42	3	-1
1554778_at	PHLDB2	2	0
1554779_s_at	PHLDB2	3	-1
1554780_a_at	PHTF2	2	0
1554781_at	MGC32805	1	1
1554782_at	C2orf19	1	1
1554783_s_at	ARHGEF2	3	-1
1554784_at	CNTN1	2	0
1554785_at	CCDC82	2	0
1554786_at	C20orf32	1	1
1554787_at	C9orf96	2	0
1554789_a_at	PDE8B	3	-1
1554790_at	ZSCAN20	2	0
1554791_a_at	C2orf67	1	1
1554793_at	UBE3C	2	0
1554794_a_at	UBE3C	2	0
1554795_a_at	FBLIM1	1	1
1554796_at	DPP6	2	0
1554797_at	SYT16	3	-1
1554798_at	SNED1	1	1
1554800_at	RAB39	2	0
1554801_at	C5orf40	1	1
1554803_s_at	TRIM72	1	1
1554804_a_at	CLDN19	1	1
1554805_at	CLDN19	2	0
1554806_a_at	FBXO8	3	-1
1554807_a_at	SPIRE1	1	1
1554808_at	ACP1	2	0
1554809_at	LOC389199	1	1
1554810_at	PLA2G4C	1	1
1554812_at	CLDN20	1	1
1554813_at	NA	1	1
1554814_at	UBE2O	1	1
1554816_at	ASTN2	3	-1
1554818_s_at	C20orf12	1	1
1554819_a_at	ITGA11	2	0
1554820_at	AGBL3	1	1
1554821_a_at	ZBED1	2	0
1554822_at	PHTF2	1	1
1554824_at	ZNF585A	1	1
1554825_at	NA	1	1
1554826_at	PFTK2	3	-1
1554827_a_at	ADCY7	2	0
1554828_at	PDGFRA	2	0
1554830_a_at	STEAP3	2	0
1554831_x_at	ALS2CR11	2	0
1554833_at	MCTP2	3	-1
1554834_a_at	RASSF5	1	1
1554835_a_at	B3GNT5	2	0
1554836_at	USP36	3	-1
1554837_a_at	CYP4A11	2	0
1554839_at	CIDEC	2	0
1554840_at	LOC280665	1	1
1554841_at	MTHFD2L	2	0
1554842_at	SLC12A1	2	0
1554844_at	EYA3	1	1
1554846_at	FLJ25770	2	0
1554847_at	ATP6V1B1	2	0
1554849_at	TOR1A	2	0
1554850_at	LOC90113	1	1
1554852_a_at	KIAA1257	3	-1
1554853_at	CYP2U1	2	0
1554855_at	PARK2	2	0
1554857_at	ELMO2	1	1
1554860_at	PTPN7	1	1
1554862_at	CMAH	1	1
1554863_s_at	DOK5	2	0
1554864_a_at	SDC3	1	1
1554865_at	NA	1	1
1554866_at	TMEM135	1	1
1554867_a_at	PRR16	1	1
1554868_s_at	PCNP	1	1
1554869_at	WDR37	2	0
1554871_at	NA	1	1
1554872_a_at	HMGCLL1	1	1
1554873_at	CSPP1	2	0
1554874_at	MITF	1	1
1554875_at	C2orf34	3	-1
1554876_a_at	S100Z	3	-1
1554878_a_at	ABCD3	1	1
1554880_at	DKFZP434K028	1	1
1554882_at	ERCC8	3	-1
1554883_a_at	ERCC8	3	-1
1554884_at	PRIM2	2	0
1554885_a_at	PRIM2	3	-1
1554886_a_at	MLXIP	1	1
1554887_at	NA	2	0
1554889_at	TIA1	2	0
1554890_a_at	TIA1	2	0
1554891_at	NA	1	1
1554892_a_at	MS4A3	1	1
1554894_a_at	PCBD2	1	1
1554895_a_at	RHBDL2	1	1
1554897_s_at	RHBDL2	2	0
1554899_s_at	FCER1G	1	1
1554901_at	GAFA1	1	1
1554903_at	FRMD8	2	0
1554905_x_at	FRMD8	2	0
1554906_a_at	MPHOSPH6	2	0
1554907_a_at	HYDIN	2	0
1554908_at	HYDIN	3	-1
1554909_at	CCDC36	2	0
1554910_at	PRKD3	1	1
1554911_at	ABCC11	1	1
1554912_at	FAM62C	3	-1
1554914_at	PLA2G4D	1	1
1554915_a_at	PDE12	2	0
1554916_a_at	JRK	1	1
1554918_a_at	ABCC4	3	-1
1554919_s_at	FLJ21062	1	1
1554920_at	SCEL	3	-1
1554921_a_at	SCEL	3	-1
1554922_at	ZNF678	2	0
1554923_at	ANKS6	2	0
1554927_at	LOC646982	1	1
1554929_at	KIAA0999	1	1
1554930_a_at	FUT8	1	1
1554931_at	CYP4A11	1	1
1554932_at	ZSWIM2	1	1
1554933_at	PSIP1	1	1
1554934_at	RCBTB1	3	-1
1554937_x_at	EXOC3L	2	0
1554938_a_at	ACOT11	1	1
1554940_a_at	LOC388882	1	1
1554941_at	KLHL14	1	1
1554942_a_at	KLHL14	2	0
1554943_at	VIL1	1	1
1554945_x_at	VIL1	1	1
1554946_at	NA	1	1
1554947_at	ACAT1	1	1
1554948_at	NA	1	1
1554949_at	LOC554174	2	0
1554950_at	ACAN	1	1
1554951_at	NA	1	1
1554952_s_at	NLRP12	3	-1
1554953_a_at	C21orf90	1	1
1554954_at	C21orf90	2	0
1554957_at	NA	2	0
1554958_at	ZNF641	3	-1
1554960_at	C1orf110	1	1
1554961_at	FGFR4	2	0
1554962_a_at	FGFR4	3	-1
1554963_at	C6orf192	3	-1
1554964_x_at	C6orf192	2	0
1554965_at	FILIP1L	1	1
1554966_a_at	FILIP1L	1	1
1554967_at	DIP2A	1	1
1554969_x_at	DIP2A	1	1
1554970_at	PDILT	1	1
1554971_at	OK/SW-CL.58	2	0
1554972_at	DDEFL1	1	1
1554973_a_at	ZBTB26	2	0
1554974_at	ACY3	1	1
1554976_a_at	C8orf43	1	1
1554977_at	LOC198437	2	0
1554978_at	C8orf68	1	1
1554980_a_at	ATF3	1	1
1554981_at	C9orf11	2	0
1554982_a_at	C9orf11	2	0
1554983_at	C21orf117	1	1
1554984_a_at	HLA-DOB	1	1
1554985_at	ZNF396	1	1
1554986_a_at	SNX19	1	1
1554987_at	GOLGA3	2	0
1554988_at	SLC9A11	1	1
1554989_at	KIAA0317	2	0
1554992_at	RASGRF1	1	1
1554994_at	RAG1	1	1
1554996_at	NA	1	1
1554997_a_at	PTGS2	1	1
1554999_at	RASGEF1B	1	1
1555000_at	OK/SW-CL.36	1	1
1555001_at	IQCF1	1	1
1555002_at	MGC39545	2	0
1555003_at	RBL1	1	1
1555004_a_at	RBL1	1	1
1555006_at	WDR66	1	1
[truncated: 52,676 more rows]
